# Supplementary material for: Plasmodium actin is incompletely folded by heterologous protein-folding machinery and likely requires the native Plasmodium chaperonin complex to enter a mature functional state
Source: PubMed Central journal article supplement (PMC5423778; doi:10.1096/fj.15-276618), 2015-10-06
Supplement: supp_fj.15-276618_Supplemental_Figure1.pdf [file supp_fj.15-276618_Supplemental_Figure1.pdf]

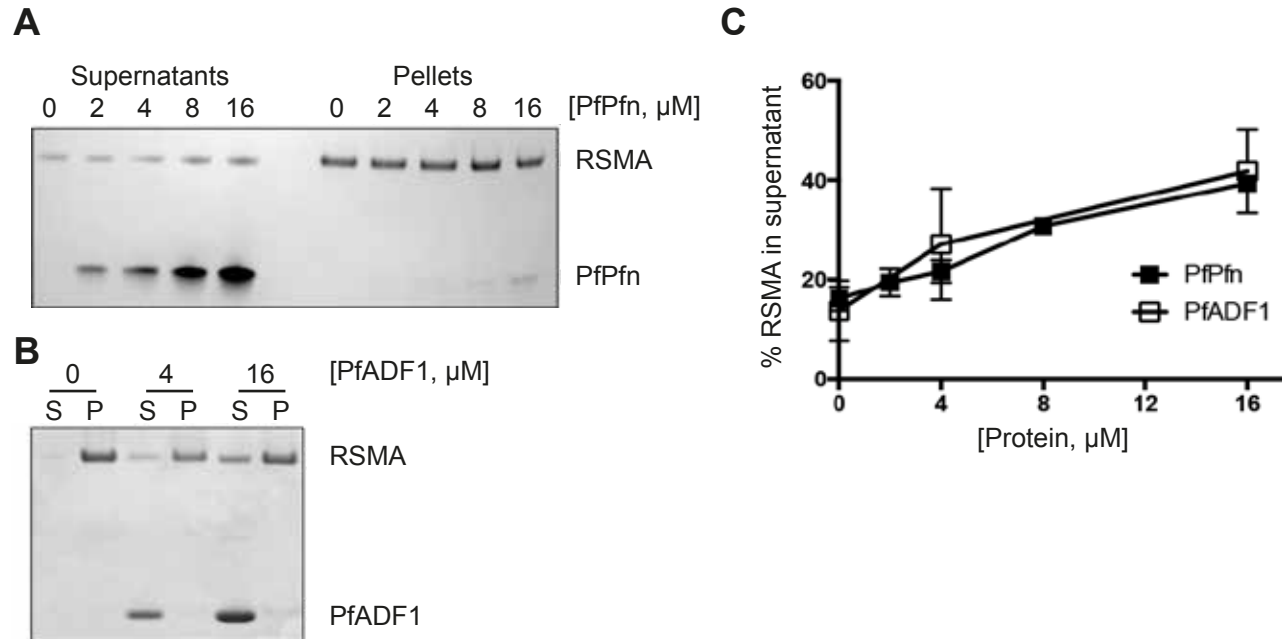

**Supplementary Figure 1: RSMA sequestration by PfPfn and PfADF1.**

Sedimentation assay demonstrating the G-actin sequestration activity of PfPfn and PfADF1 on RSMA monomers. (A-B) SDS-PAGE of supernatants (S) and pellets (P) post high-speed centrifugation. RSMA is constant at 2  $\mu\text{M}$ , (A) PfPfn and (B) PfADF1 are varied from 0-16  $\mu\text{M}$ . (C) Quantification by densitometry of the percentage of RSMA remaining in the supernatant. Values are +/- S.E.M (n=3).
