# Supplementary material for: Plasmodium actin is incompletely folded by heterologous protein-folding machinery and likely requires the native Plasmodium chaperonin complex to enter a mature functional state
Source: PubMed Central journal article supplement (PMC5423778; doi:10.1096/fj.15-276618), 2015-10-06
Supplement: supp_fj.15-276618_Supplemental_Figure2.pdf [file supp_fj.15-276618_Supplemental_Figure2.pdf]

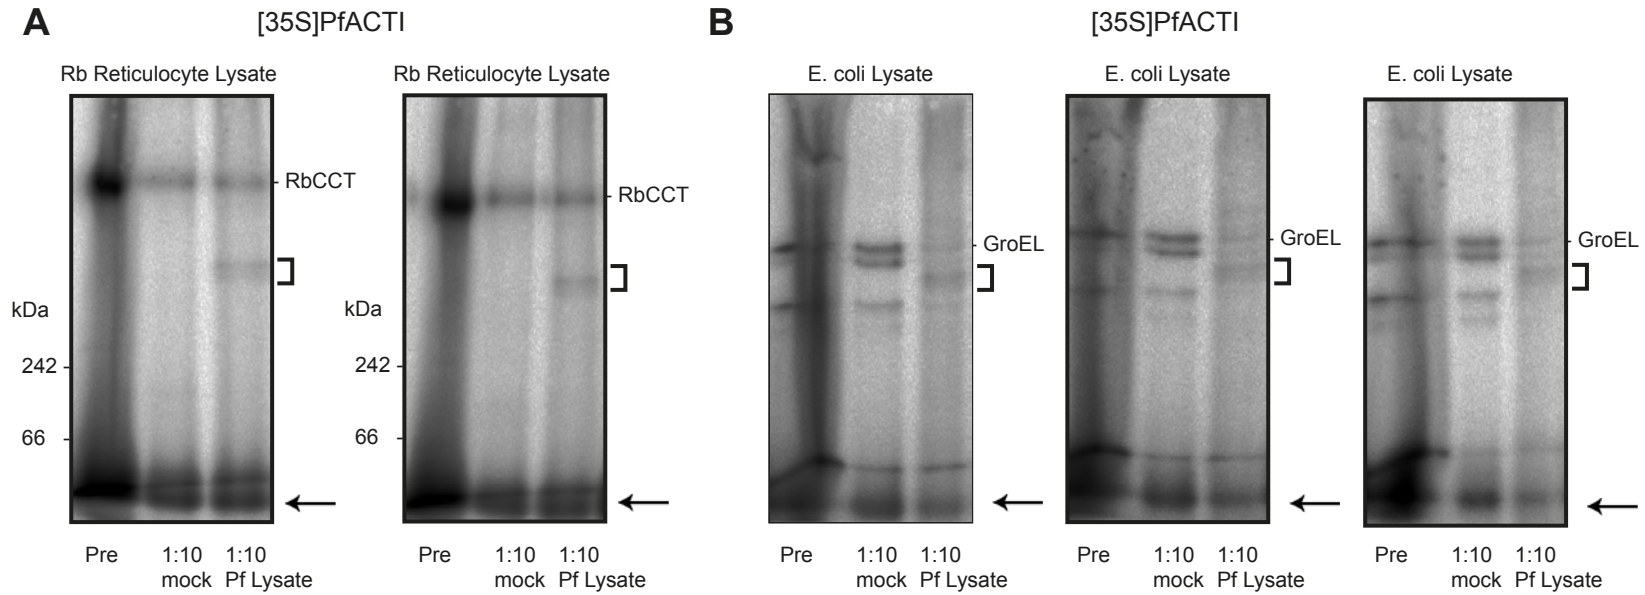

**Supplementary Figure 2: Repetition Experiments of [35S]-PfACTI added to *P. falciparum* cell extract.** Repeated native PAGE analysis of [35S]-PfACTI translated in (A) rabbit reticulocyte (two additional replicates) or (B) *E. coli* lysate (three additional replicates) for 40 minutes (Pre), added to extract preparation buffer (mock) or *P. falciparum* cell extract (Pf lysate) at a 1:10 ratio of [35S]-PfACTI:*P. falciparum* cell extract for 15 min. Square bracket indicates possible complex formation in *P. falciparum* lysate. Arrow indicates monomeric [35S]-PfACTI.
